# Supplementary material
Source: PubMed Central journal article supplement (PMC521089)

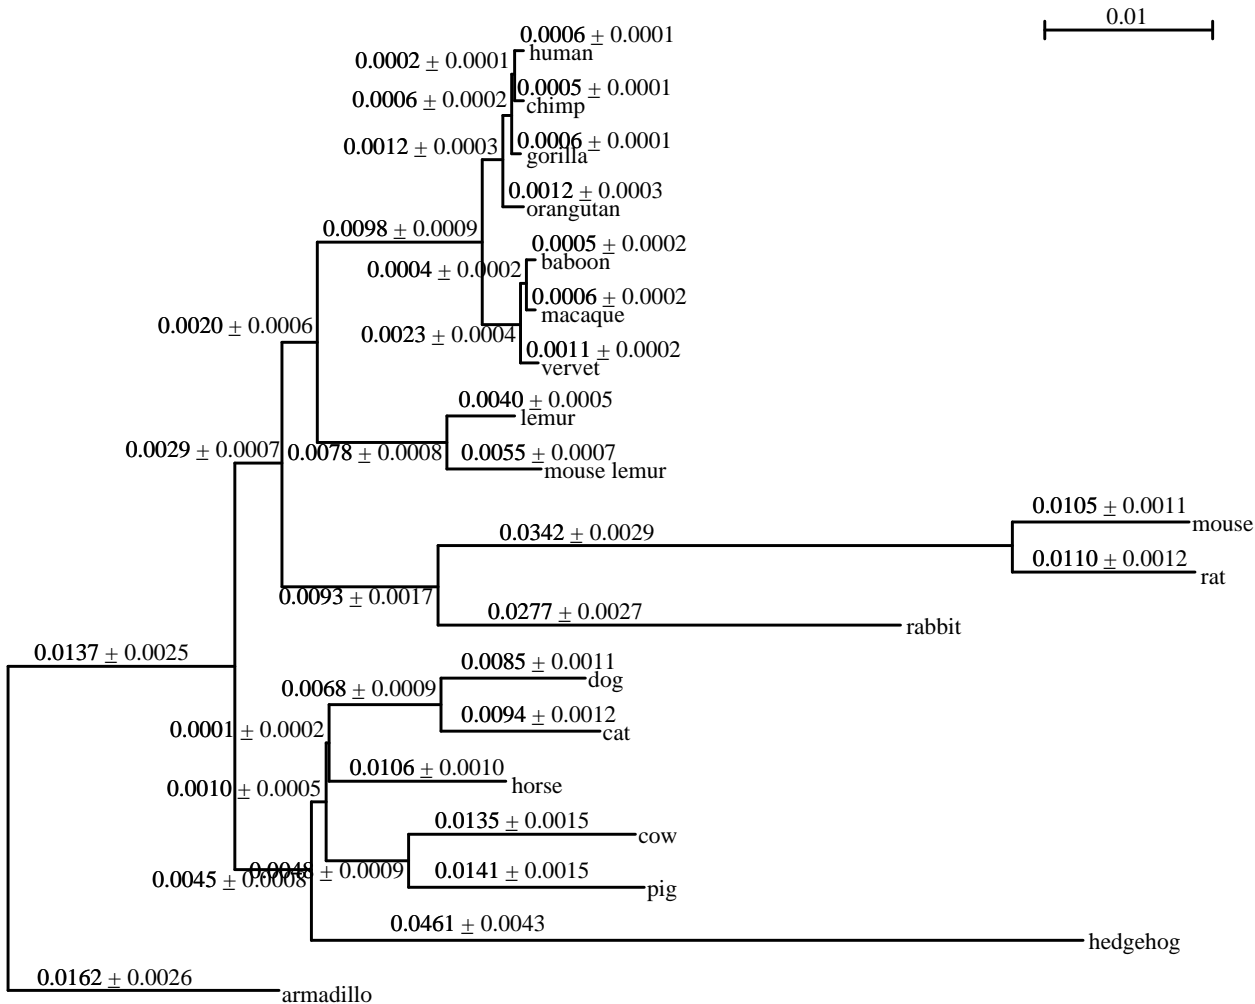

Supplement: pnas_101_39_13994__10.pdf [file pnas_101_39_13994__10.pdf]

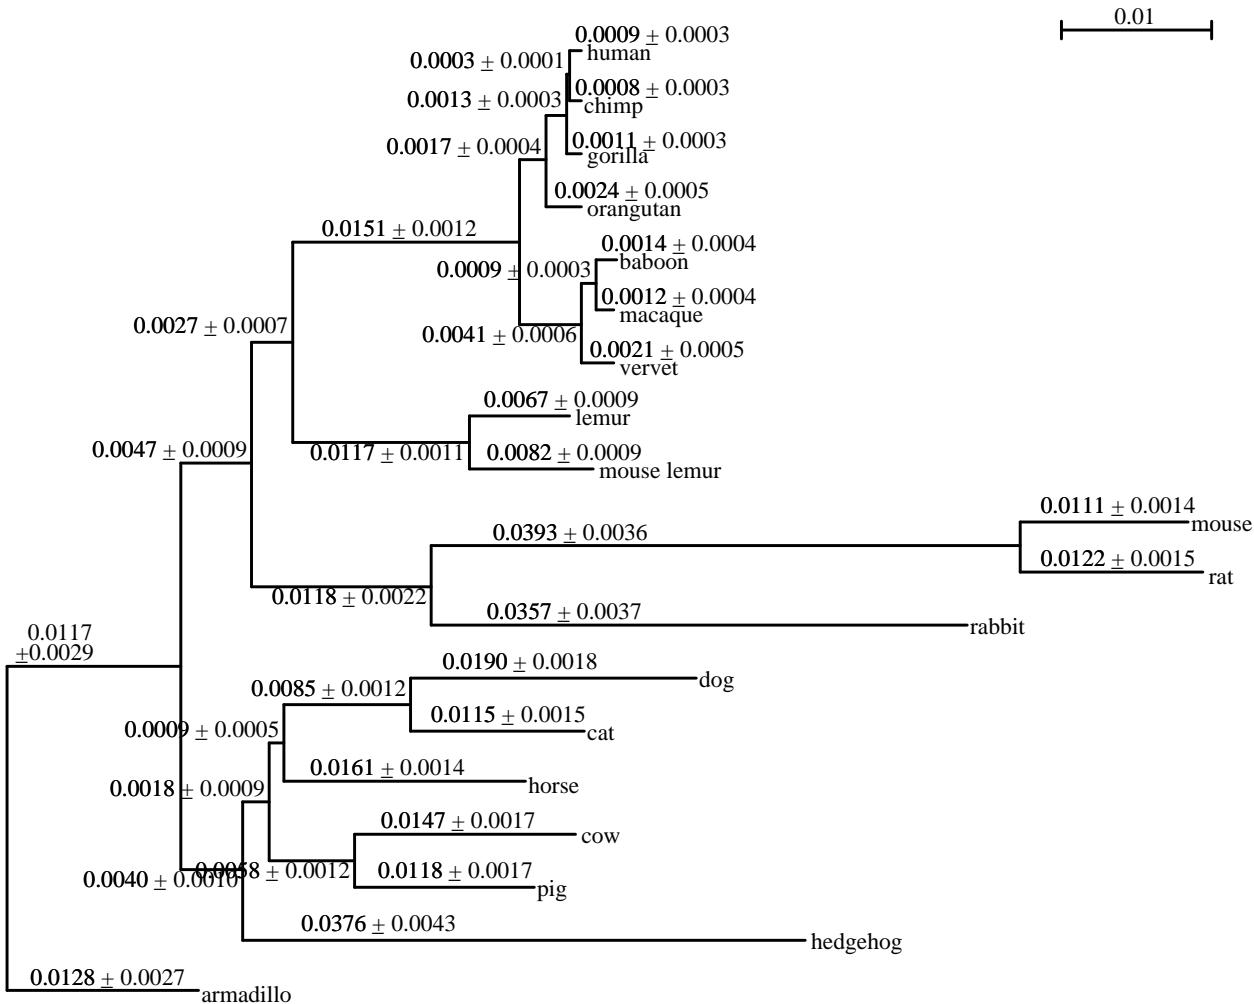

Supplement: pnas_101_39_13994__11.pdf [file pnas_101_39_13994__11.pdf]

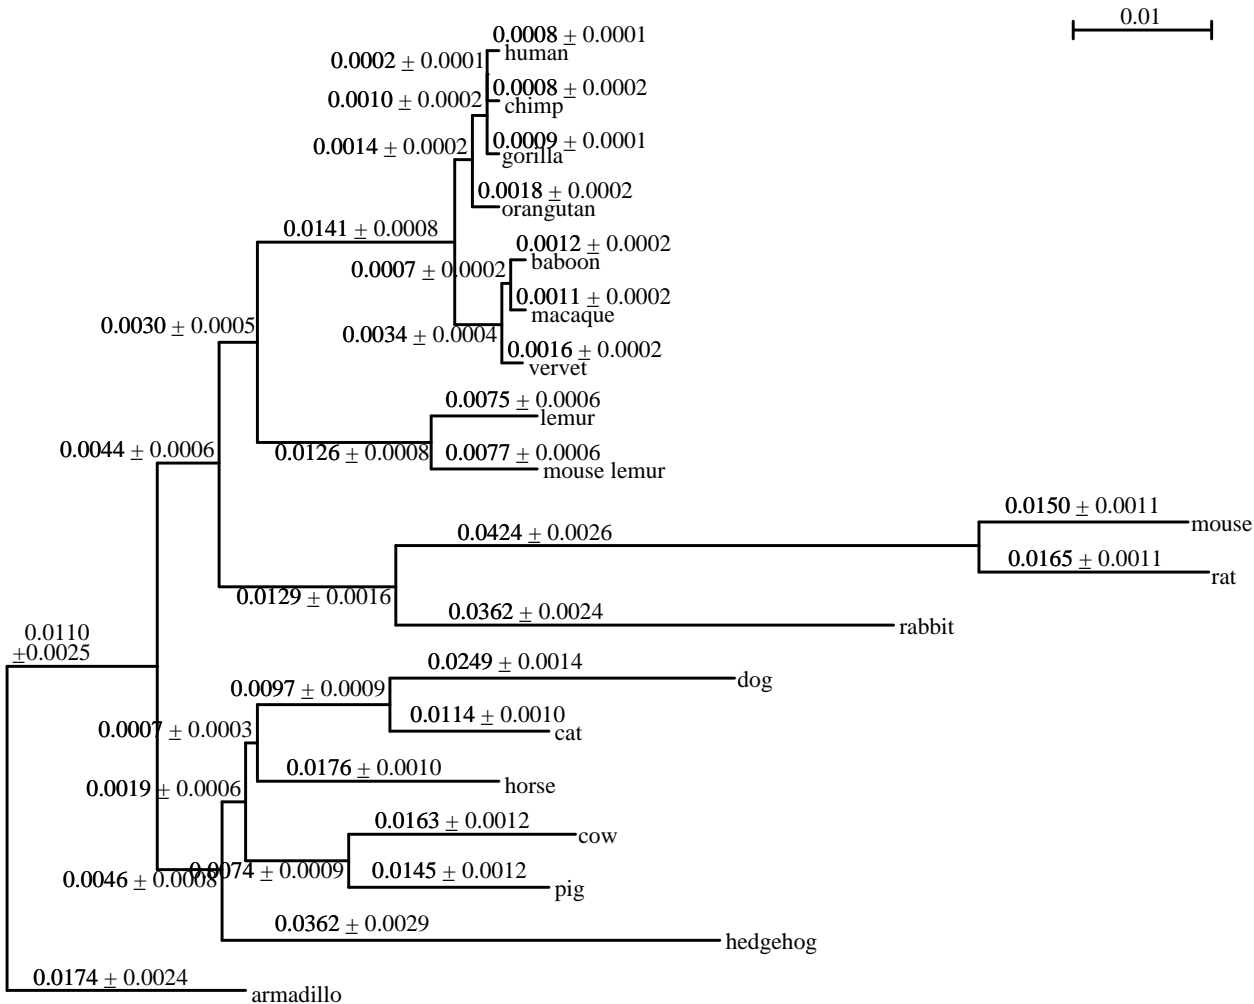

Supplement: pnas_101_39_13994__12.pdf [file pnas_101_39_13994__12.pdf]

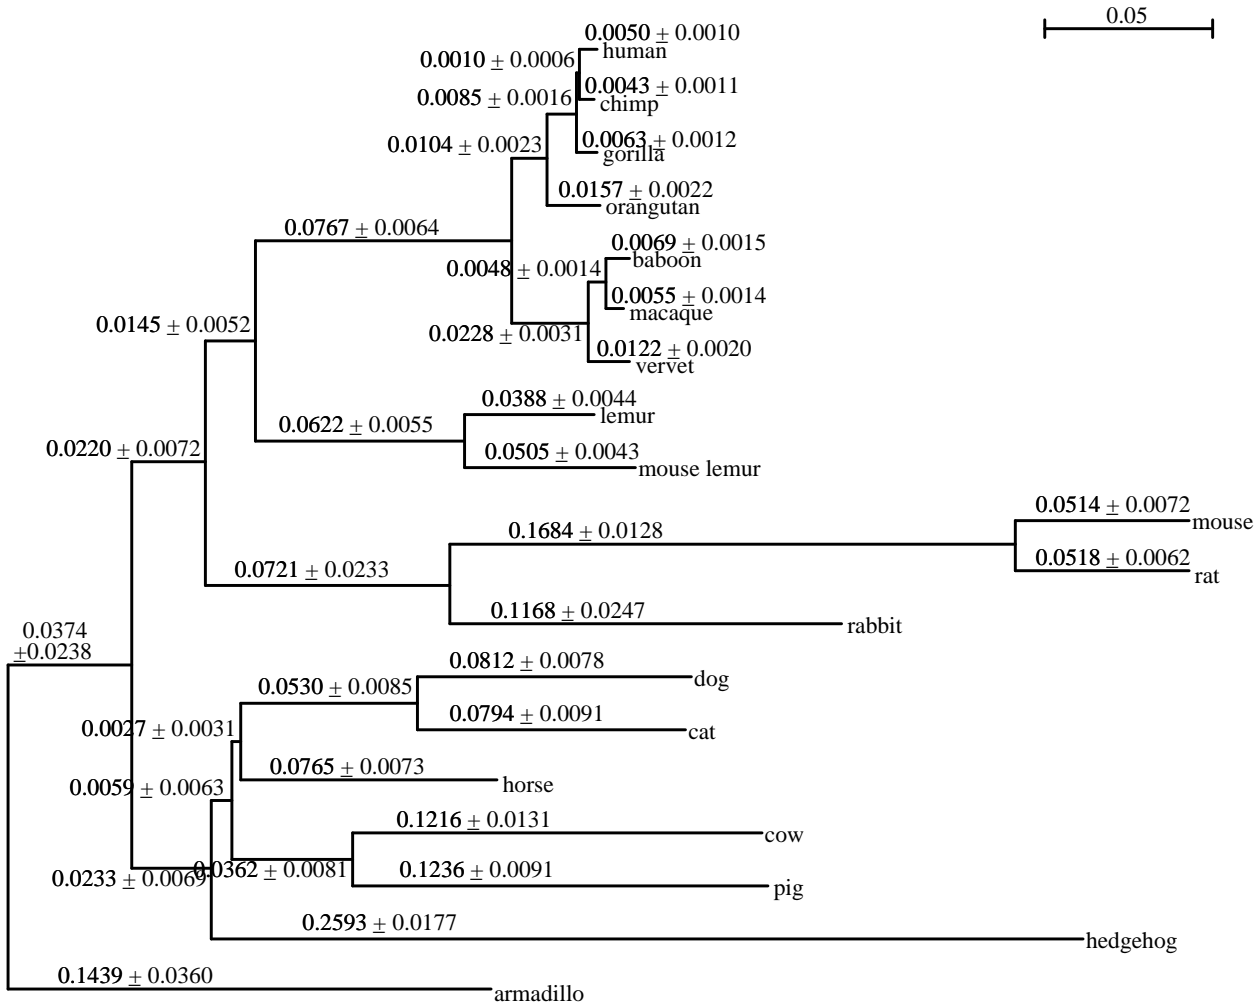

Supplement: pnas_101_39_13994__13.pdf [file pnas_101_39_13994__13.pdf]

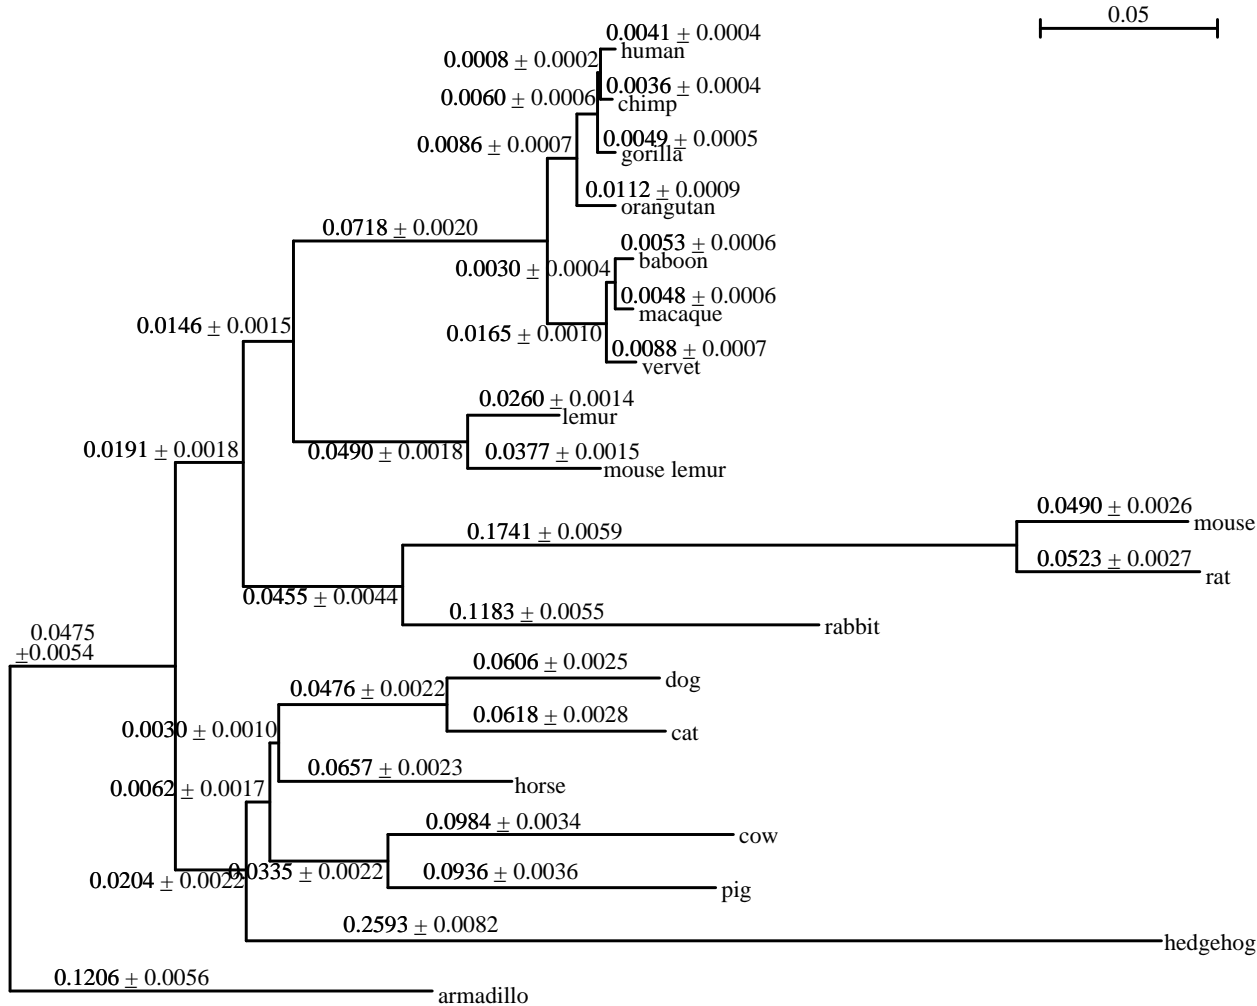

Supplement: pnas_101_39_13994__14.pdf [file pnas_101_39_13994__14.pdf]

0.2

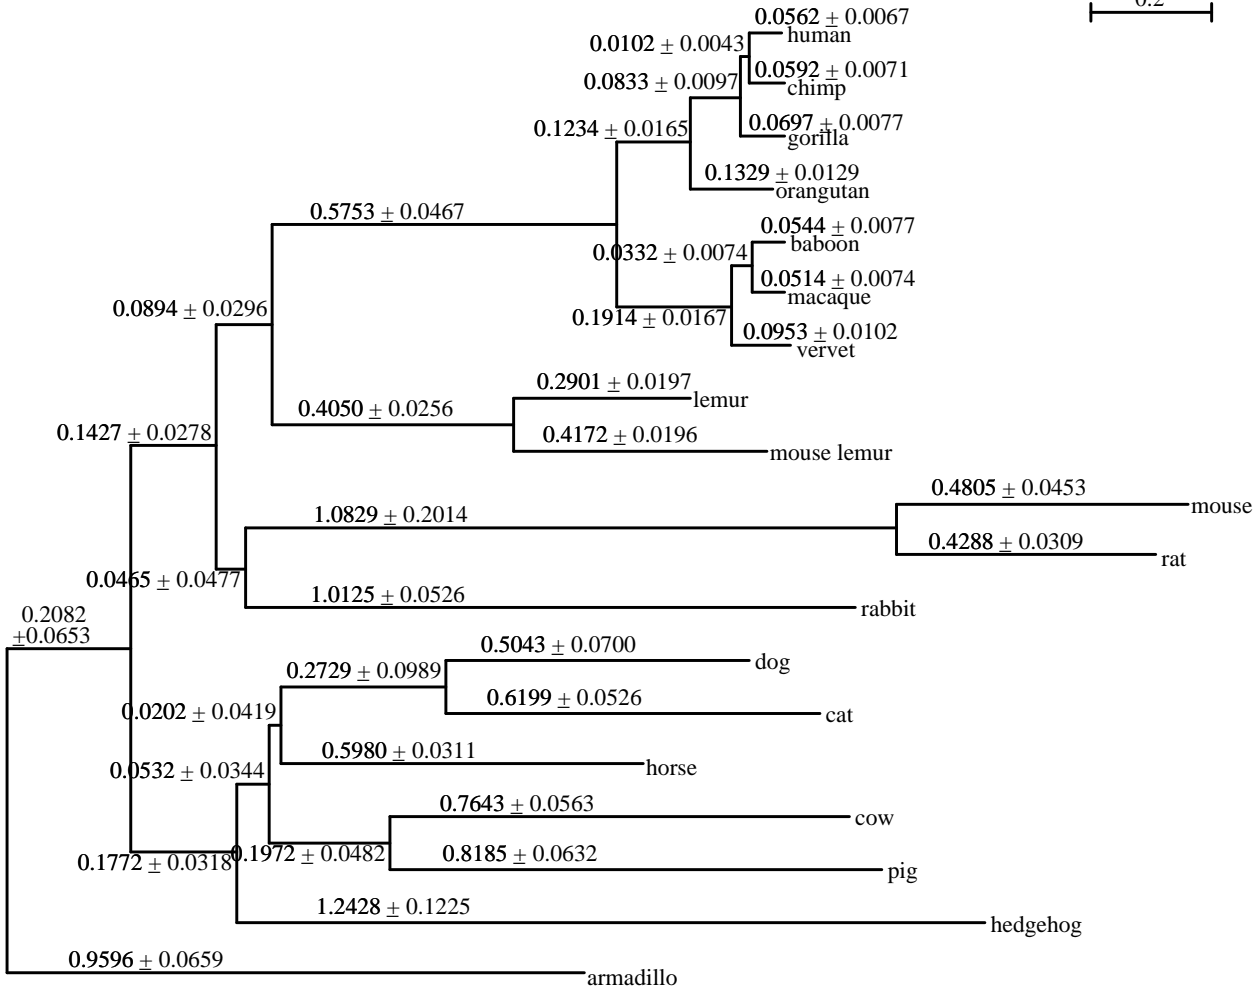

Supplement: pnas_101_39_13994__15.pdf [file pnas_101_39_13994__15.pdf]

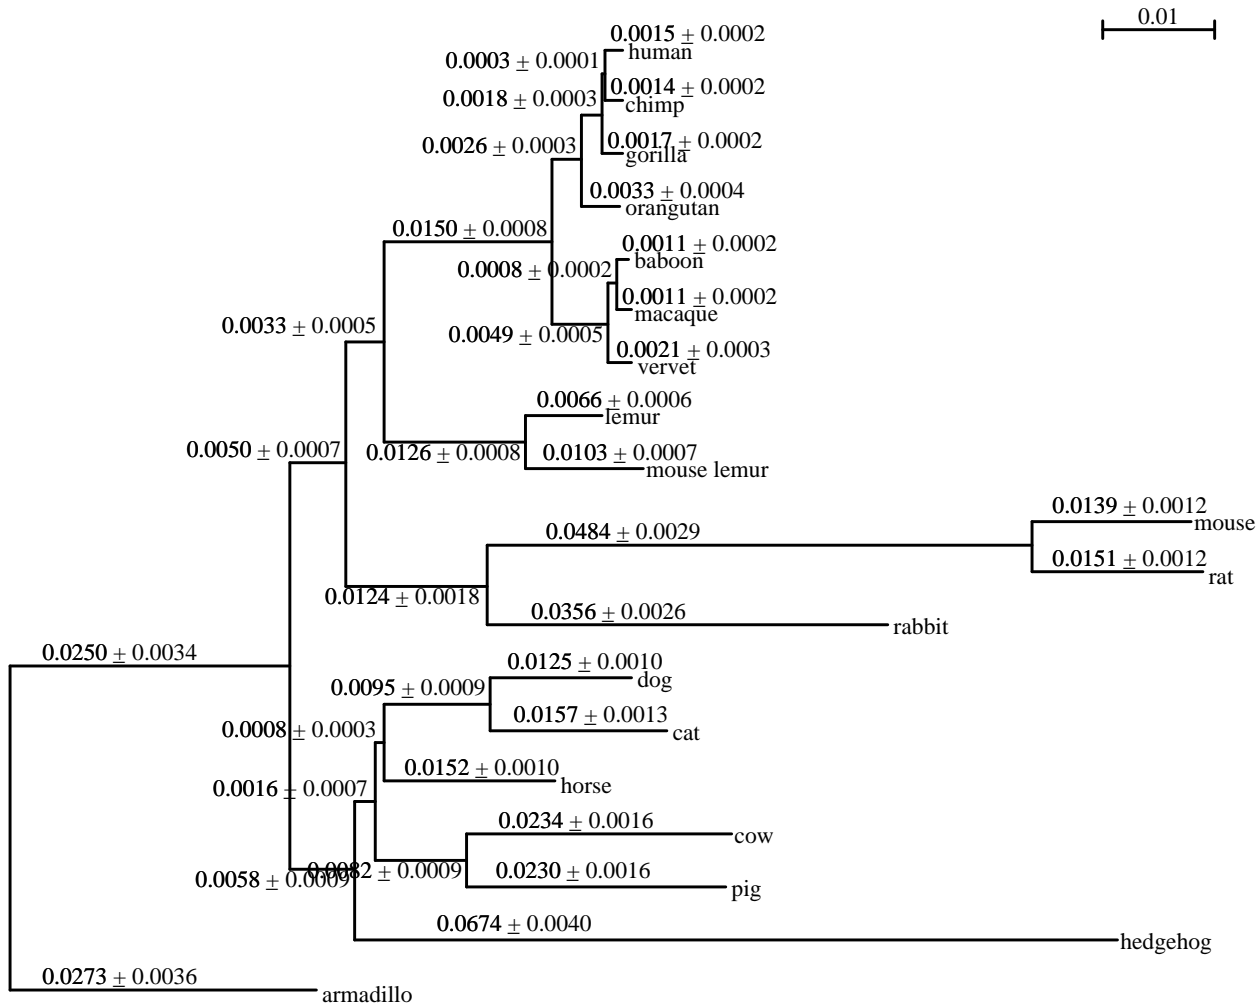

Supplement: pnas_101_39_13994__16.pdf [file pnas_101_39_13994__16.pdf]

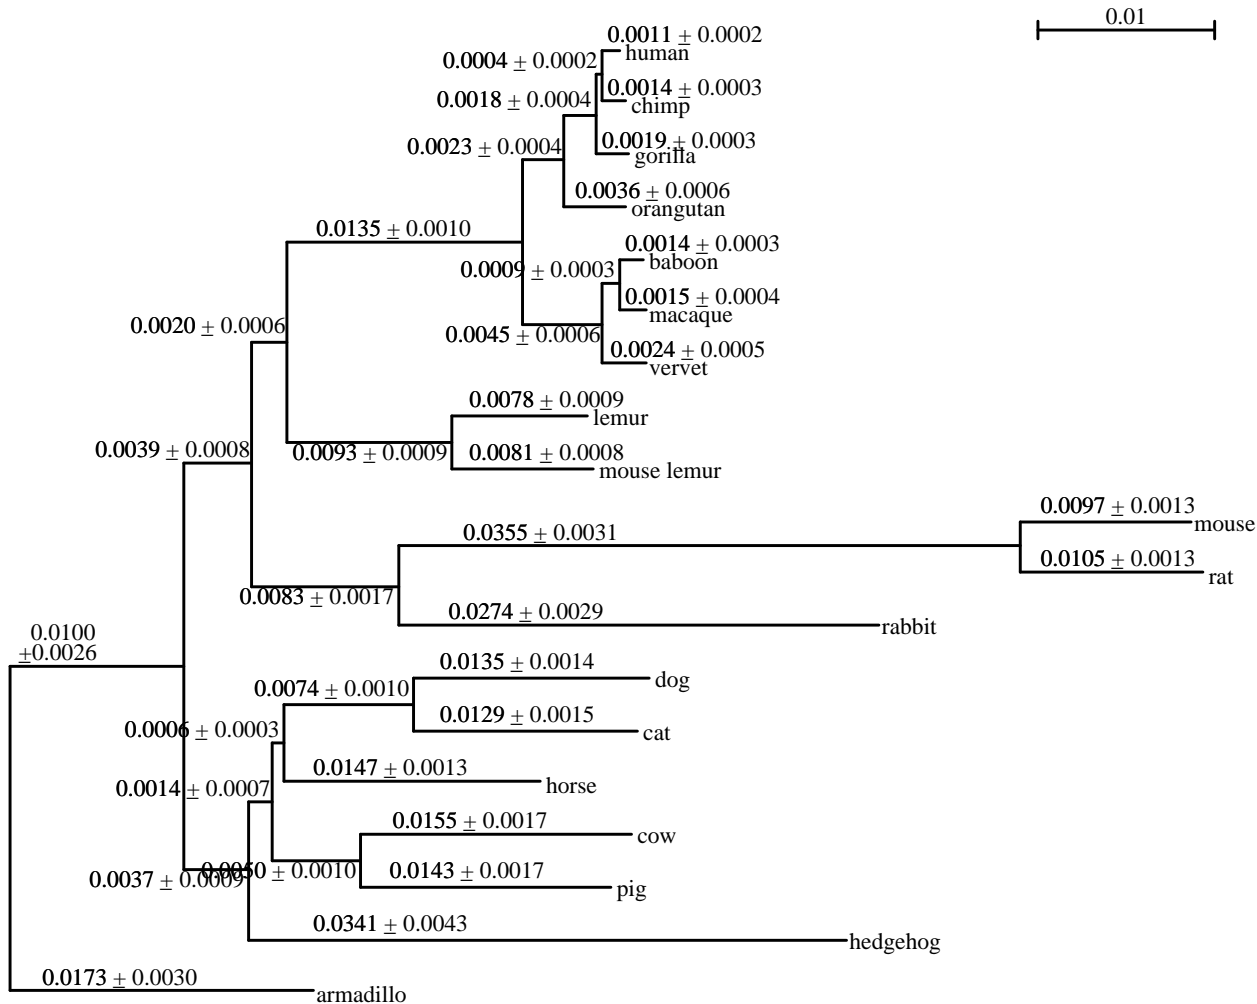

Supplement: pnas_101_39_13994__17.pdf [file pnas_101_39_13994__17.pdf]

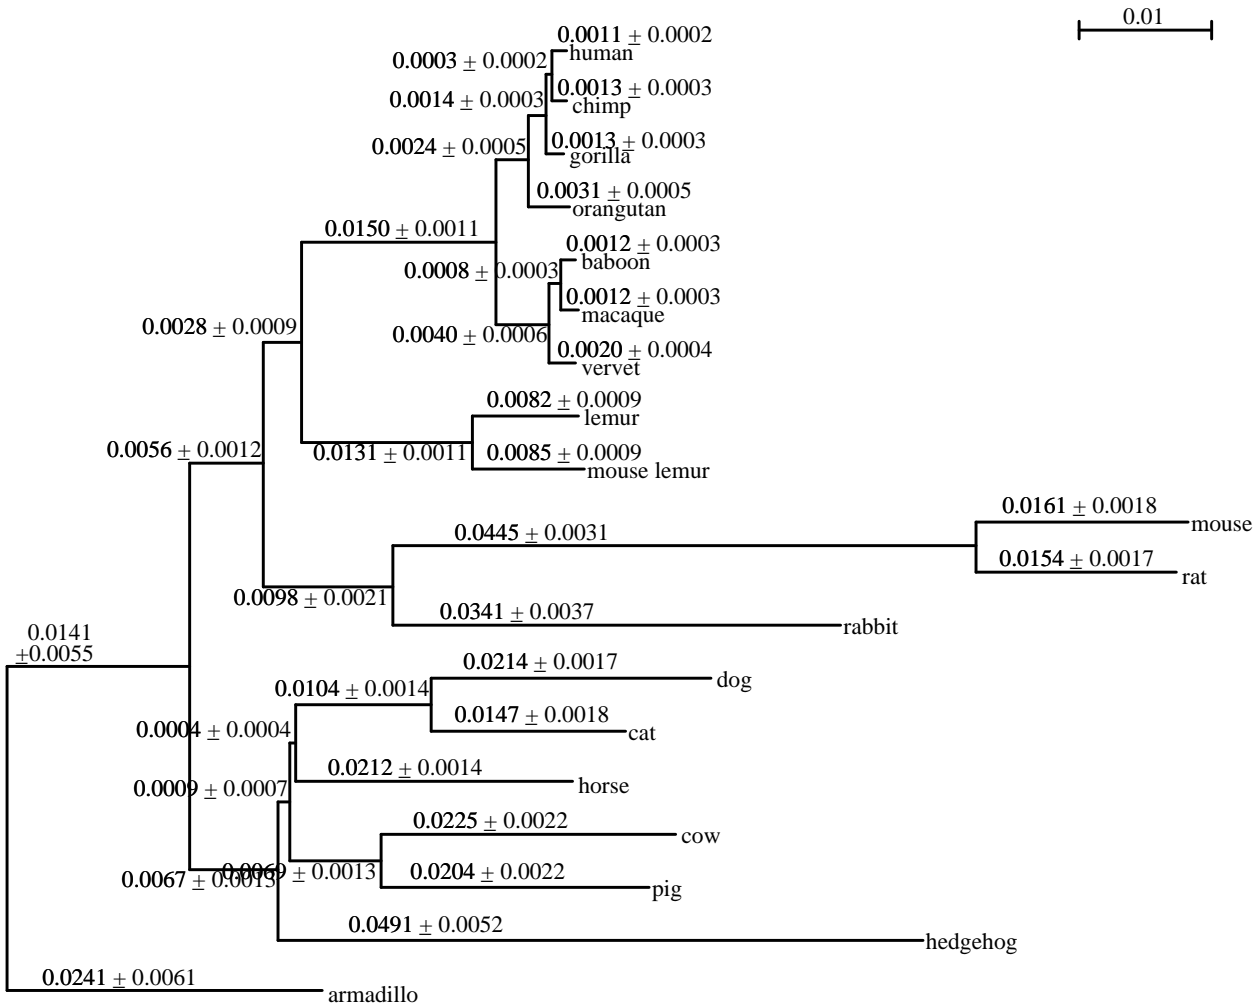

Supplement: pnas_101_39_13994__18.pdf [file pnas_101_39_13994__18.pdf]

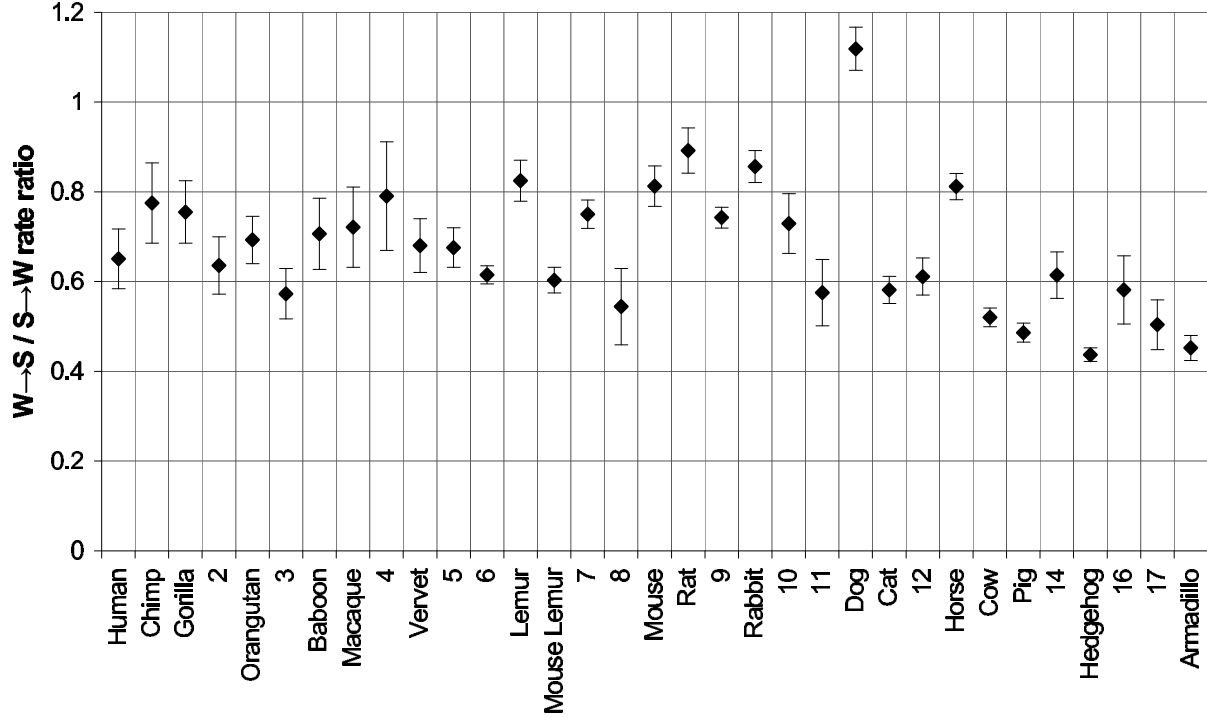

Supplement: pnas_101_39_13994__19.pdf [file pnas_101_39_13994__19.pdf]

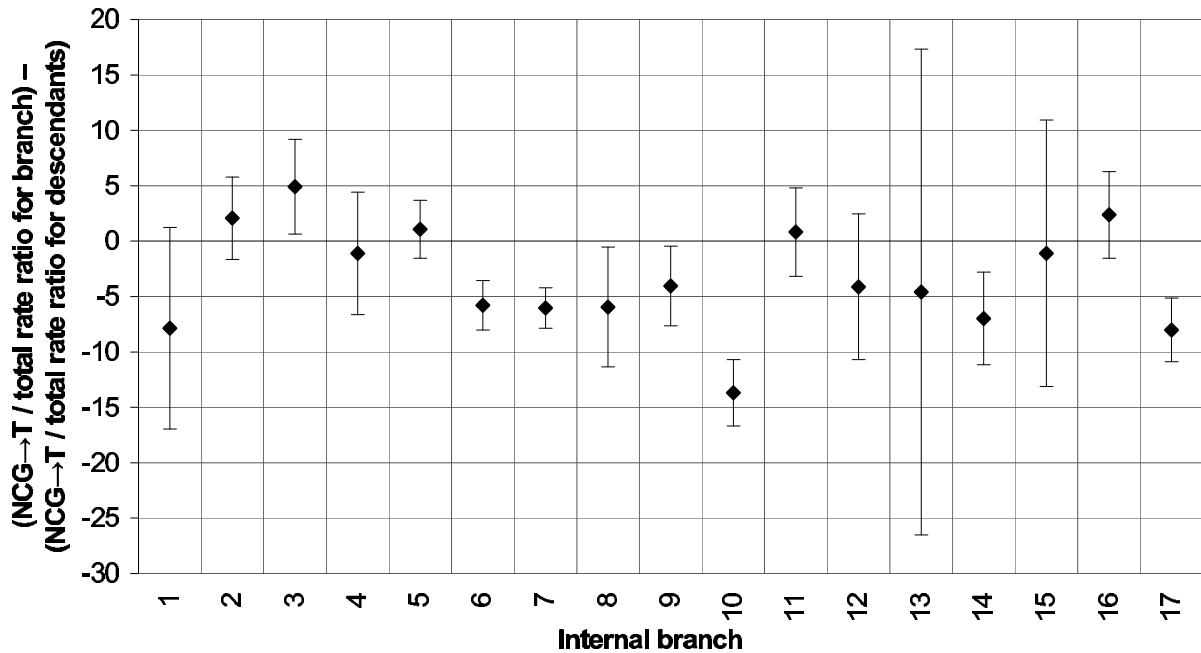

Supplement: pnas_101_39_13994__20.pdf [file pnas_101_39_13994__20.pdf]

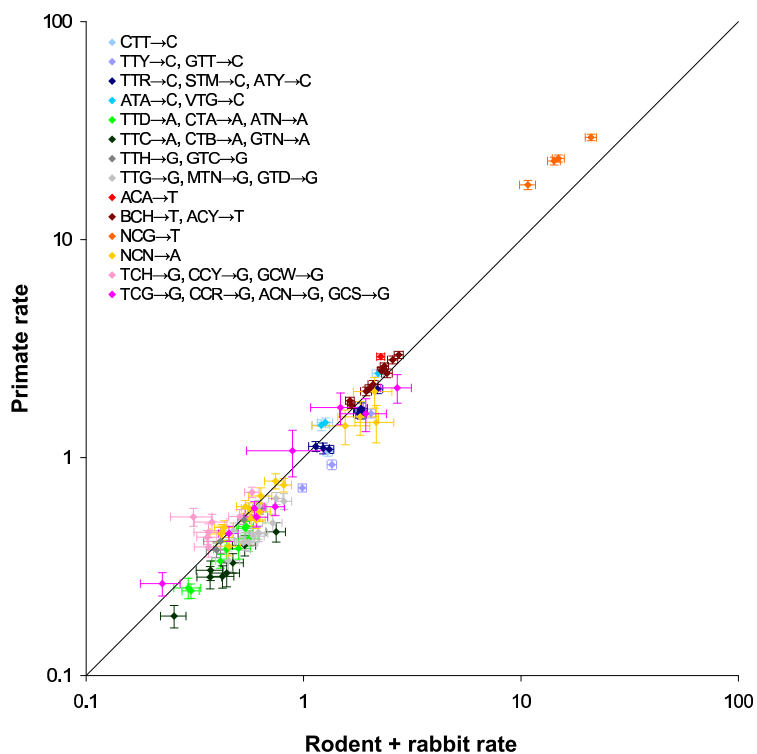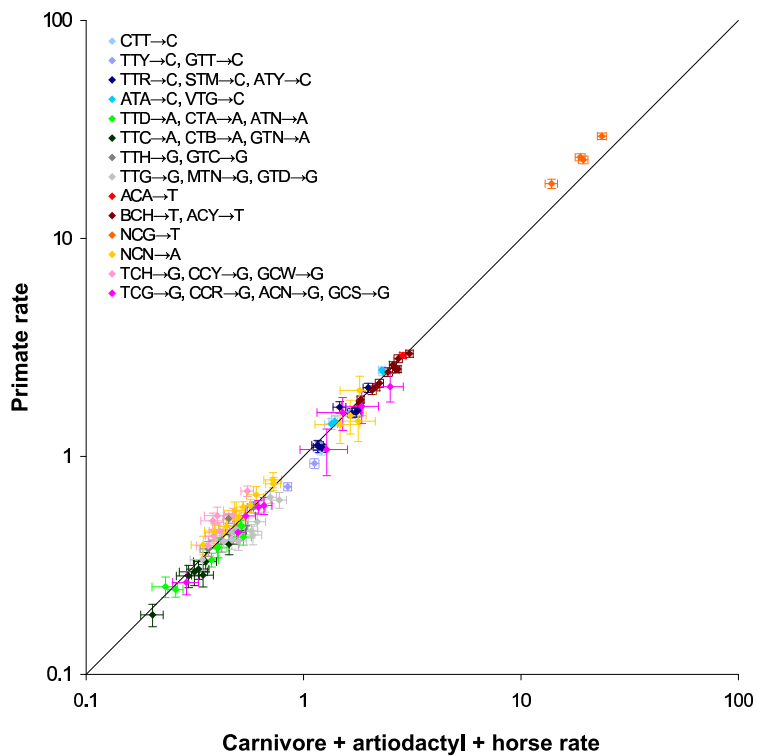

Supplement: pnas_101_39_13994__3.pdf [file pnas_101_39_13994__3.pdf]

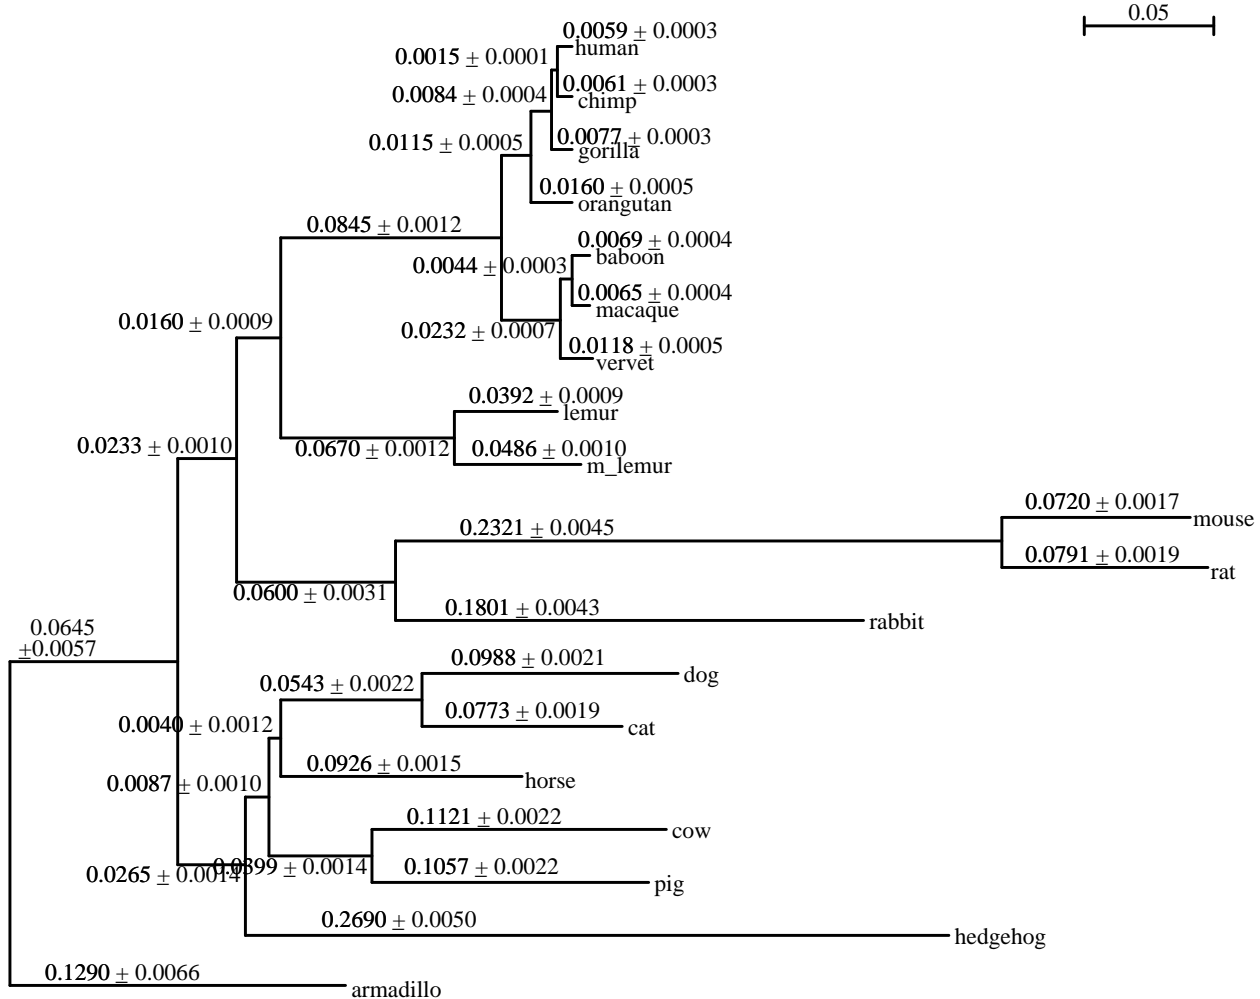

Supplement: pnas_101_39_13994__4.pdf [file pnas_101_39_13994__4.pdf]

0.02

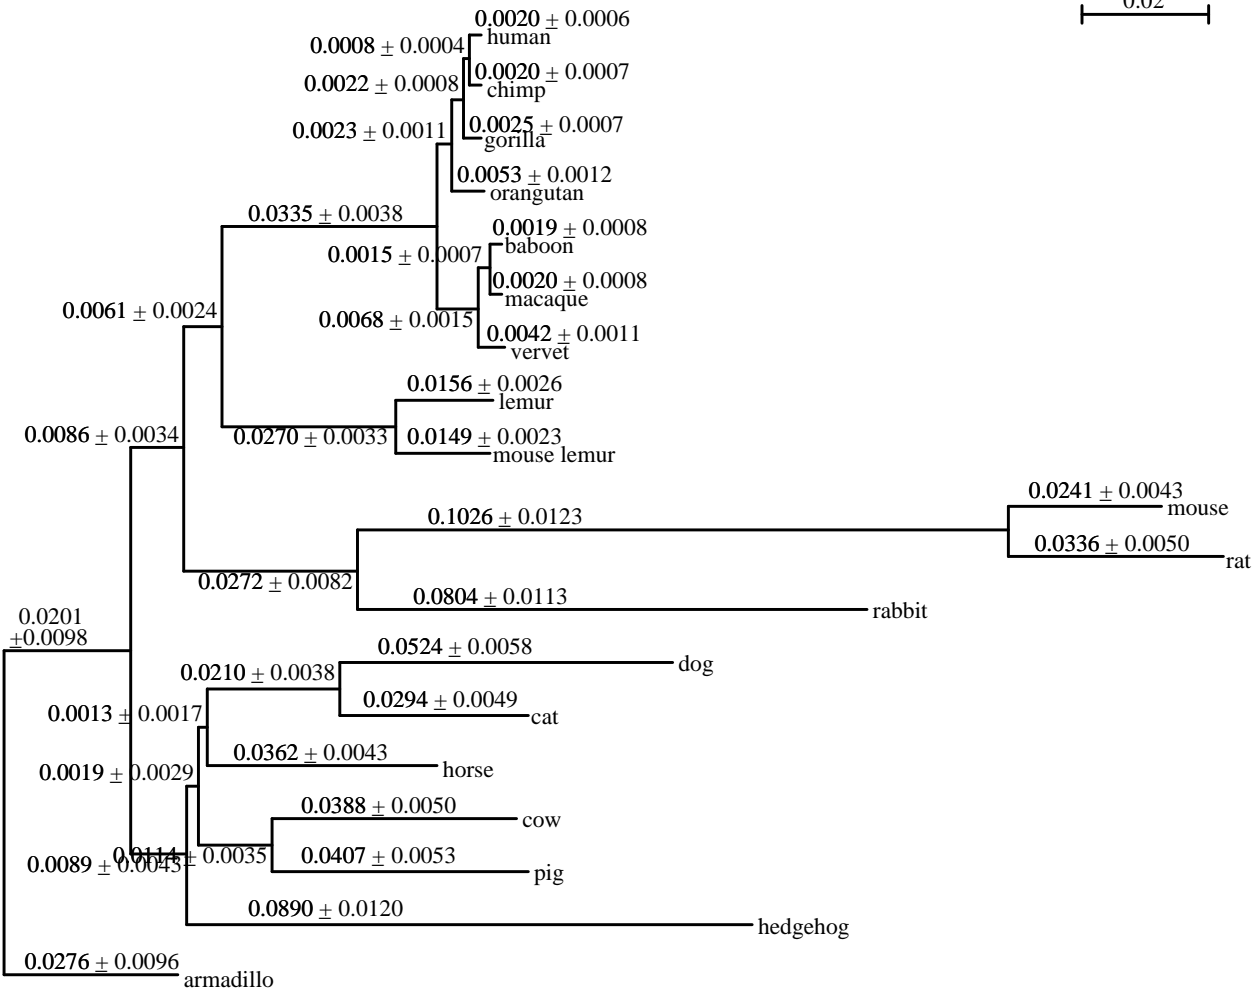

Supplement: pnas_101_39_13994__5.pdf [file pnas_101_39_13994__5.pdf]

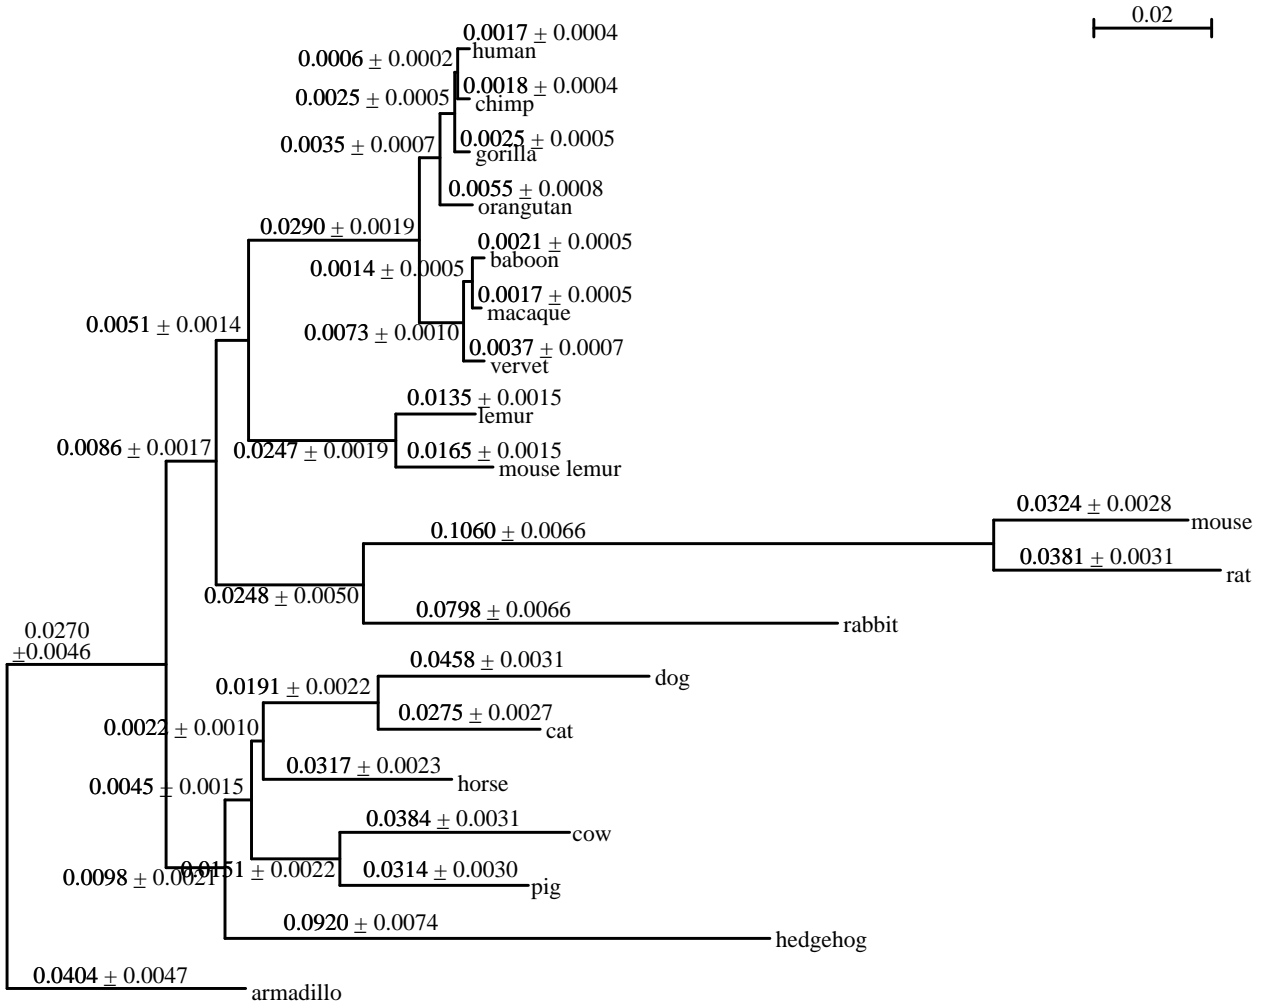

Supplement: pnas_101_39_13994__6.pdf [file pnas_101_39_13994__6.pdf]

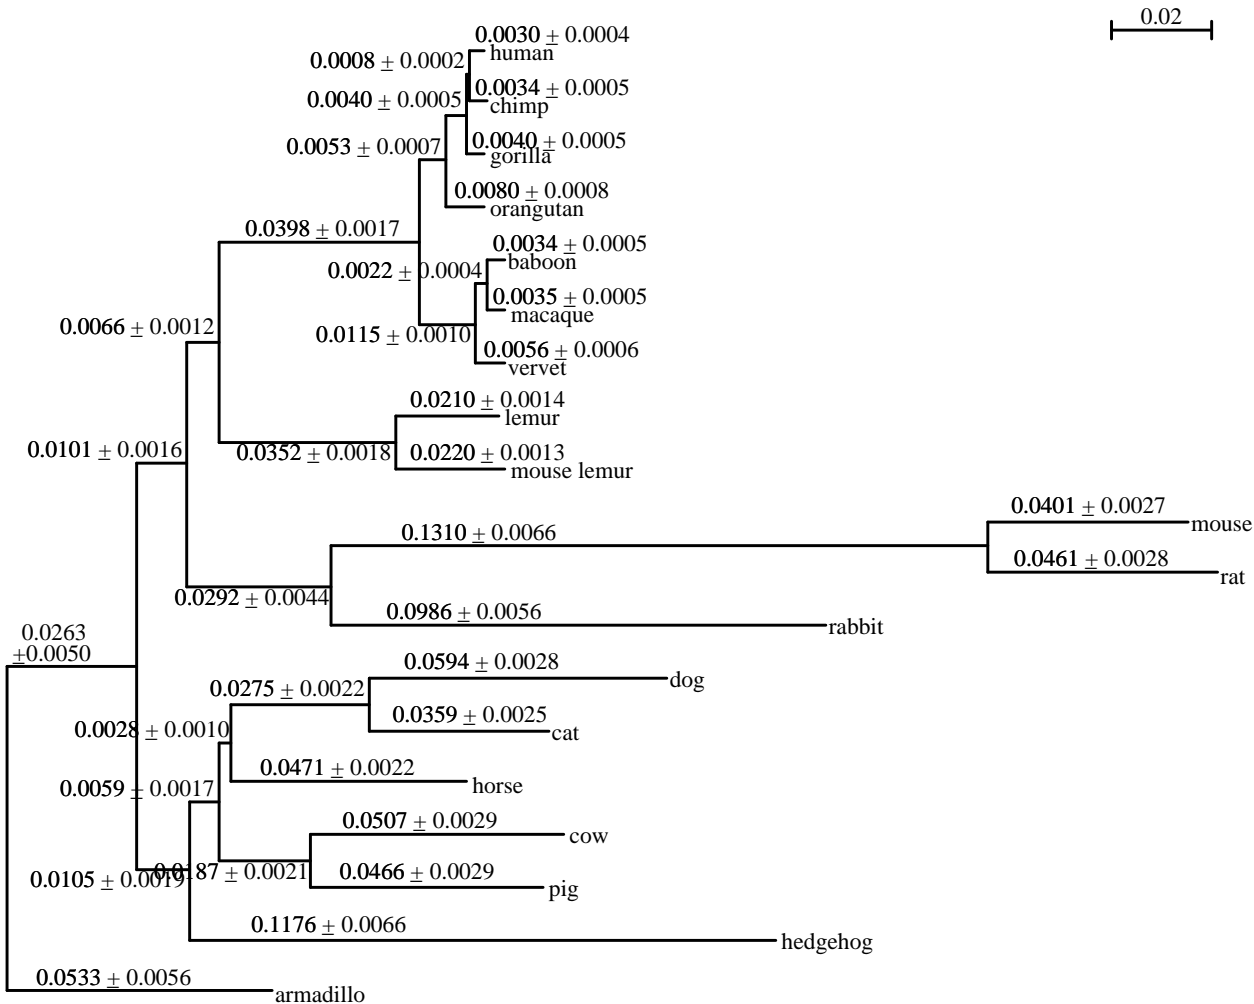

Supplement: pnas_101_39_13994__7.pdf [file pnas_101_39_13994__7.pdf]

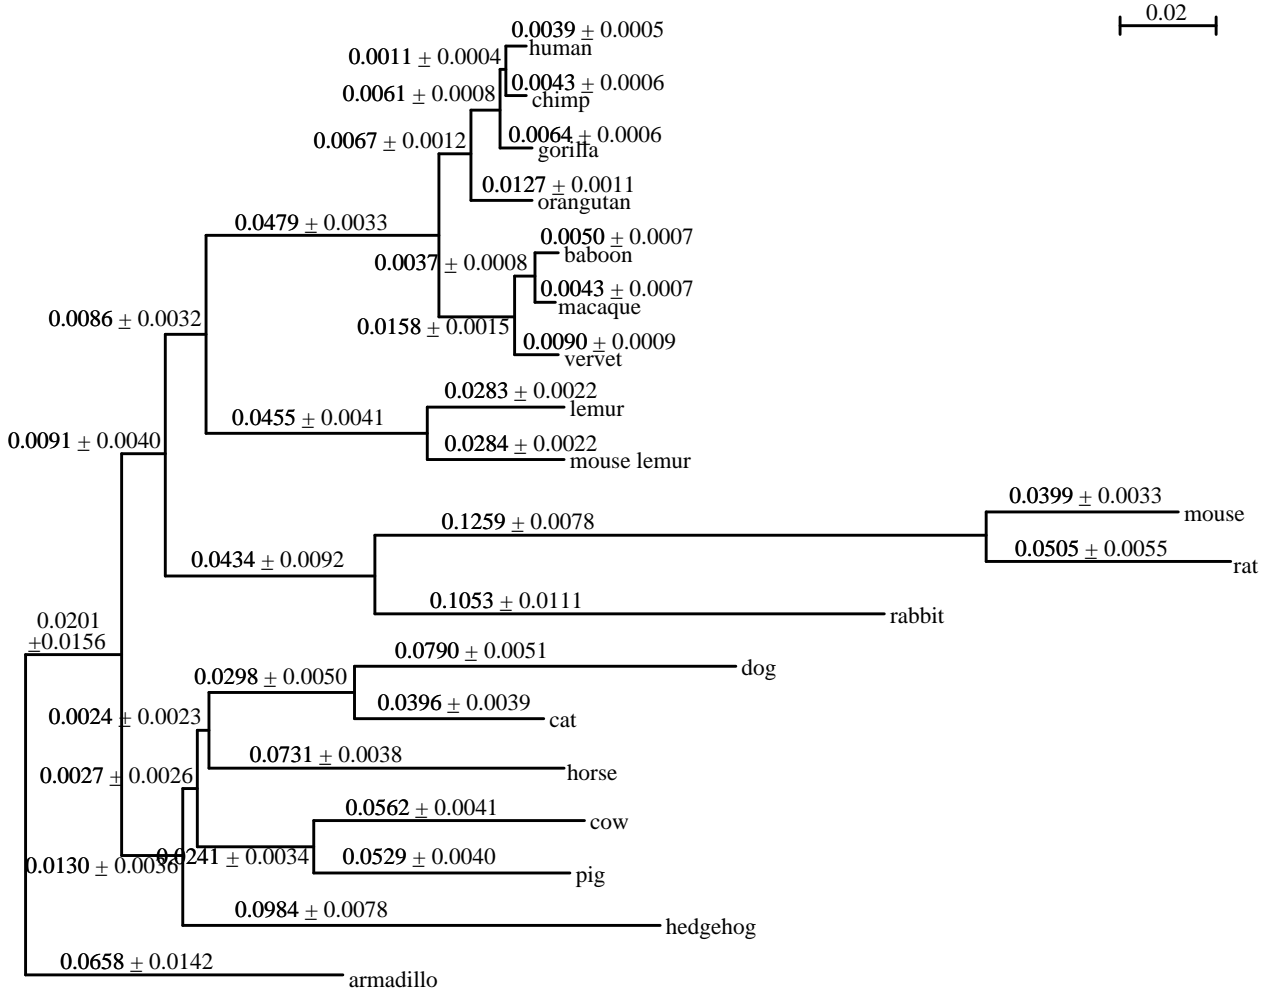

Supplement: pnas_101_39_13994__8.pdf [file pnas_101_39_13994__8.pdf]

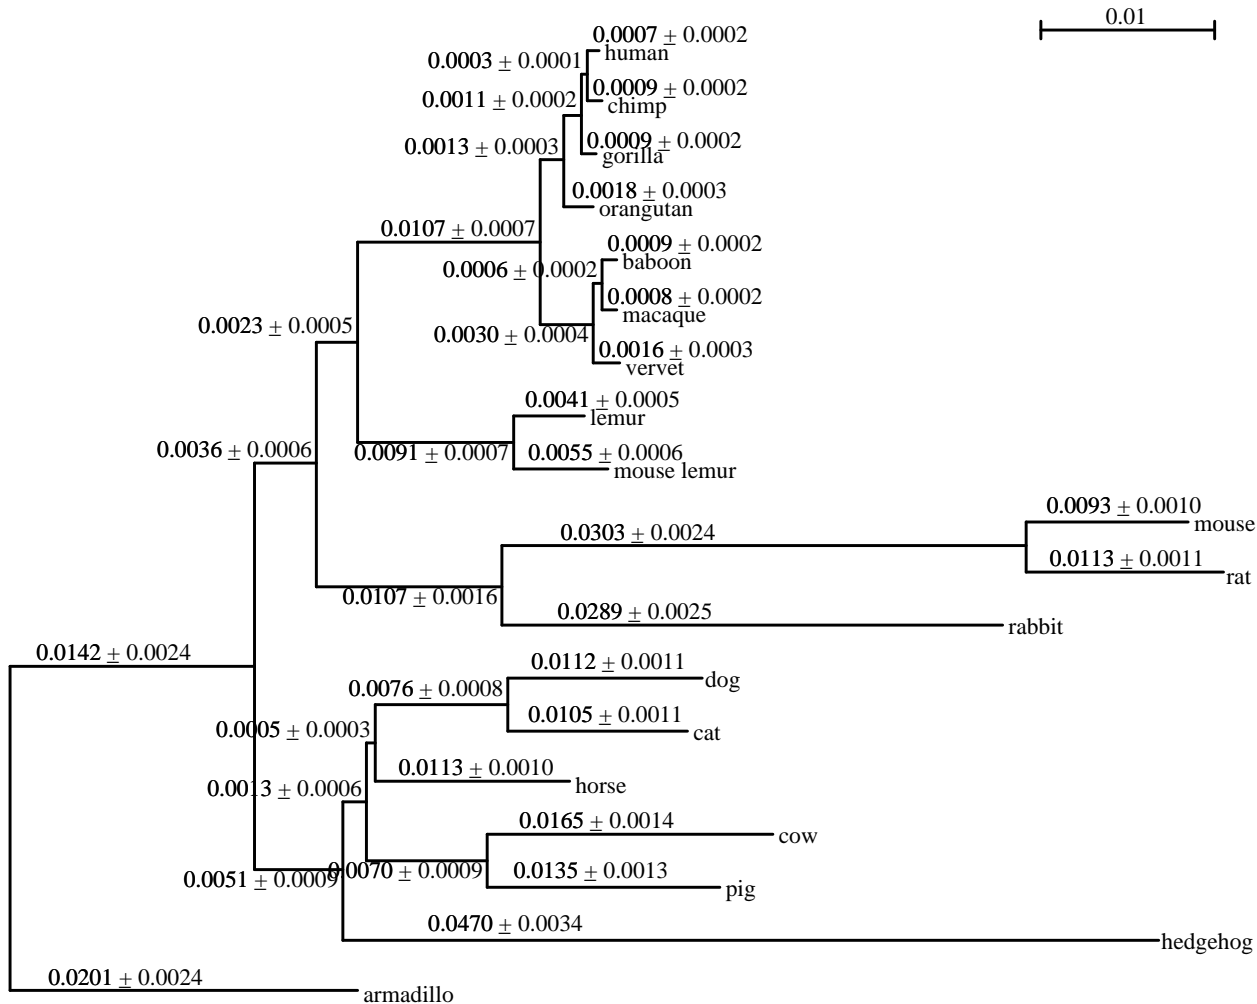

Supplement: pnas_101_39_13994__9.pdf [file pnas_101_39_13994__9.pdf]
